# Supplementary material for: Selective oxidation of 5-hydroxymethylfurfural to 2,5-diformylfuran over a Cu–acetonitrile complex
Source: Royal Society of Chemistry journal article supplement (doi:10.1039/c9nj00465c), 2019-01-01
Supplement: c9nj00465c1.pdf [file c9nj00465c1.pdf]

## Supplementary Material

### Selective oxidation of 5-hydroxymethyl furfural into 2,5-formaldehyde furan over Cu-acetonitrile complex

Zuojun Wei<sup>a</sup>, Shuwen Xiao<sup>a</sup>, Mengting Chen<sup>b</sup>, Meng Lu<sup>b</sup>, Yingxin Liu<sup>\*b</sup>

<sup>a</sup> Key Laboratory of Biomass Chemical Engineering of the Ministry of Education, College of Chemical and Biological Engineering, Zhejiang University, 38 Zheda Road, Xihu District, Hangzhou 310027, P.R. China

<sup>b</sup> Research and Development Base of Catalytic Hydrogenation, College of Pharmaceutical Science, Zhejiang University of Technology, 18 Chaowang Road, Xiacheng District, Hangzhou 310014, P.R. China

Email: yxliu@zju.edu.cn

Figure s1 (a) MS of DFF

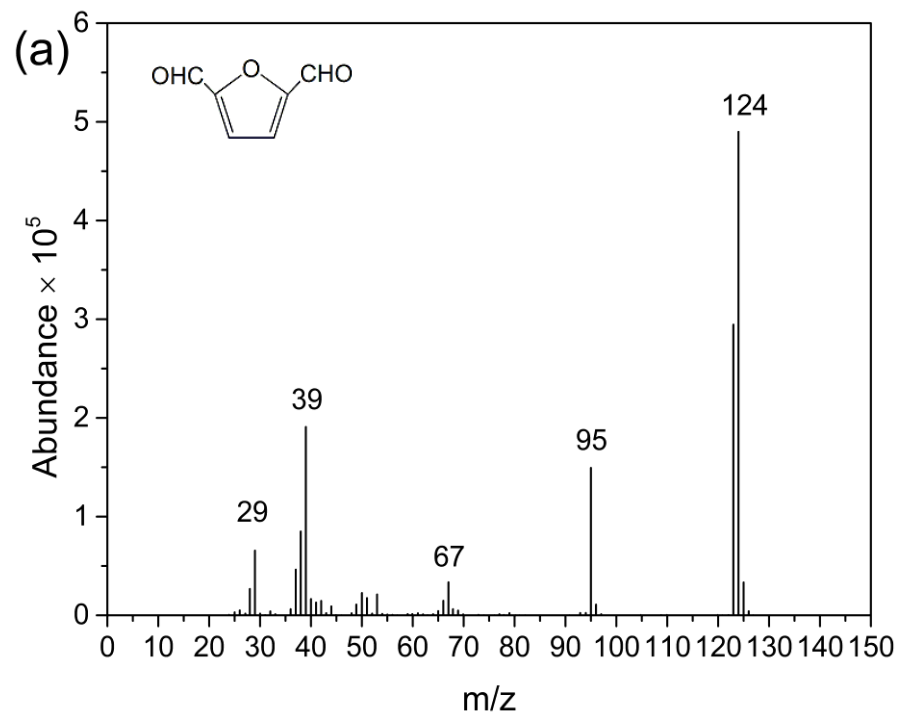

Figure s1 (b) MS of 5-HMF

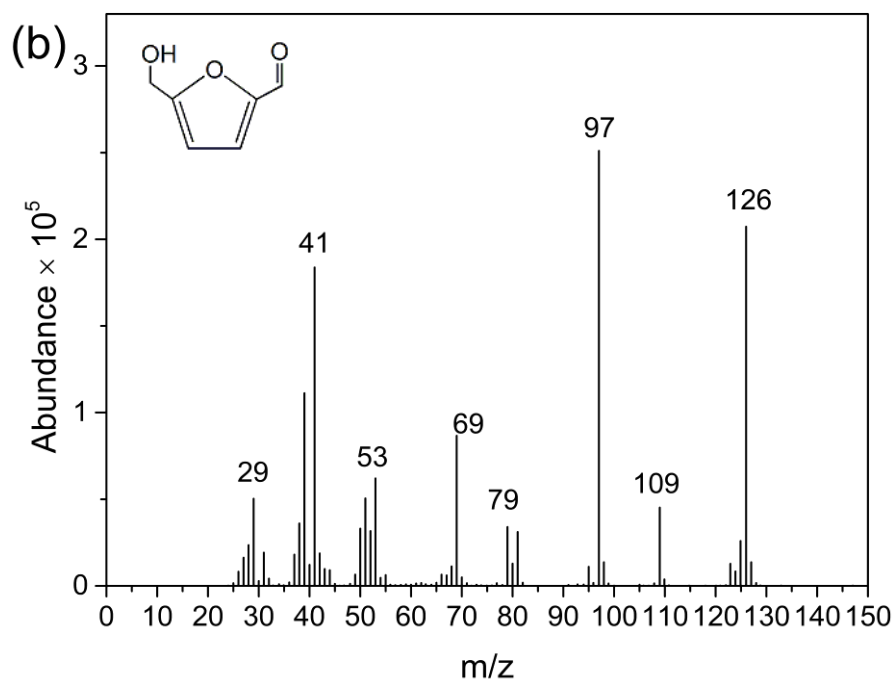

Figure s1. The mass spectra of DFF and 5-HMF

Figure s2 (a)  $^1\text{H}$  NMR of 5-HMF

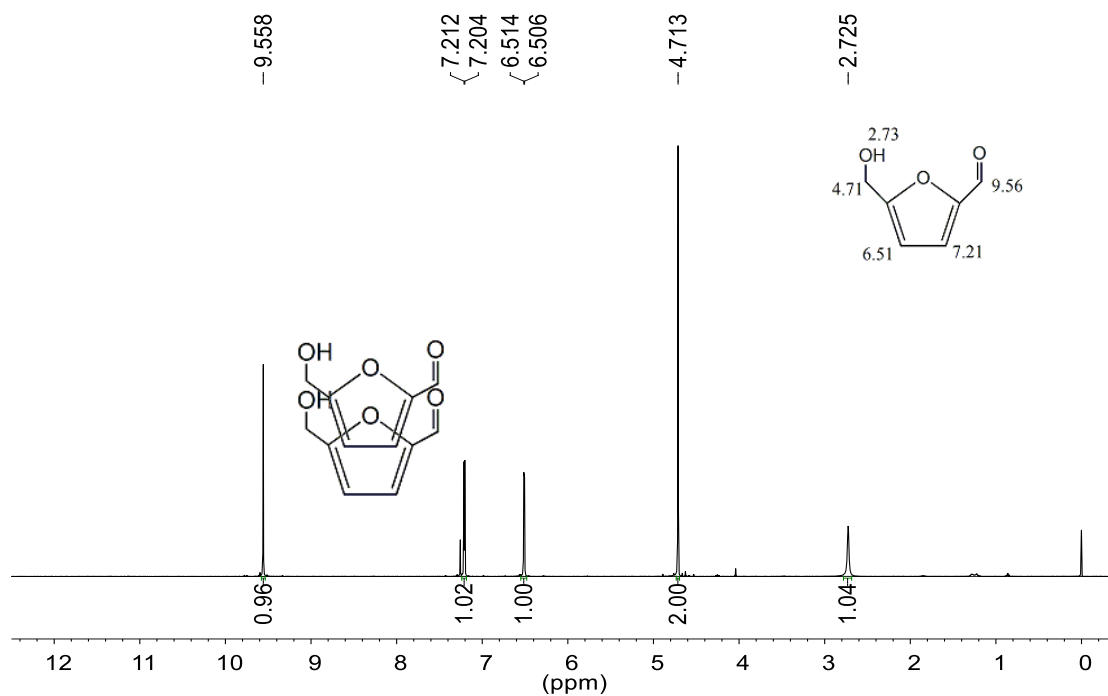

$^1\text{H}$  NMR (400 MHz,  $\text{CDCl}_3$ )  $\delta$  9.56 (s, 1H), 7.21 (d,  $J = 3.5$  Hz, 1H), 6.51 (d,  $J = 3.5$  Hz, 1H), 4.71 (s, 2H), 2.73 (s, 1H).

Figure s2 (b)  $^{13}\text{C}$  NMR of 5-HMF

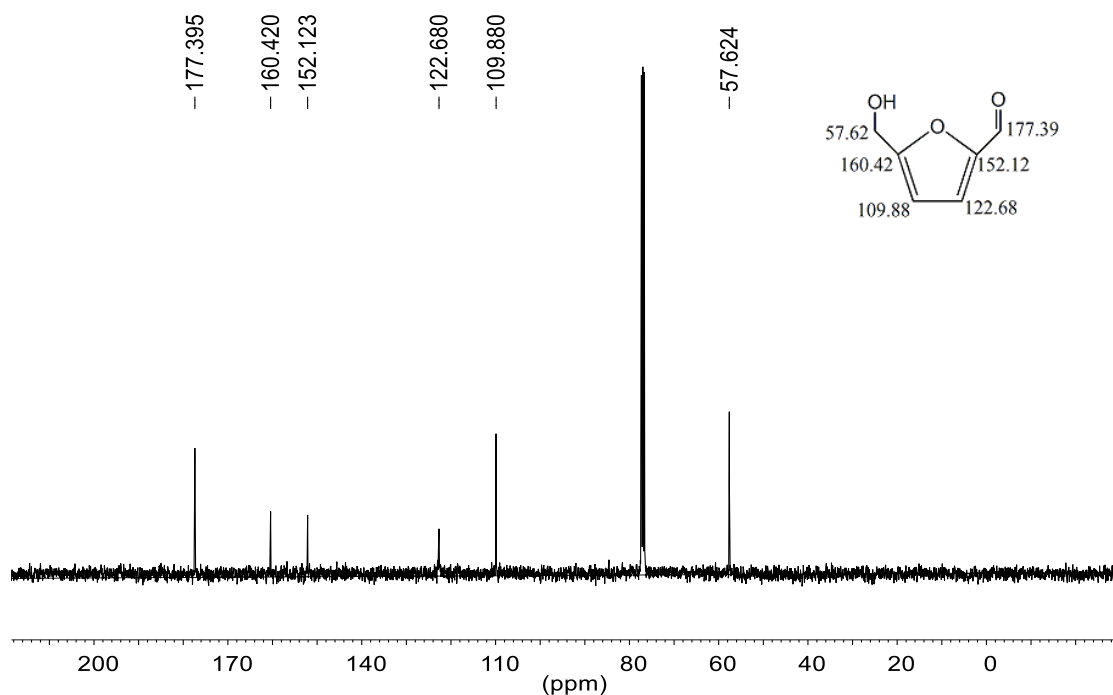

$^{13}\text{C}$  NMR (101 MHz,  $\text{CDCl}_3$ )  $\delta$  177.39 (s), 160.42 (s), 152.12 (s), 122.68 (s), 109.88 (s), 57.62 (s).

Figure s2 (c)  $^1\text{H}$  NMR of DFF

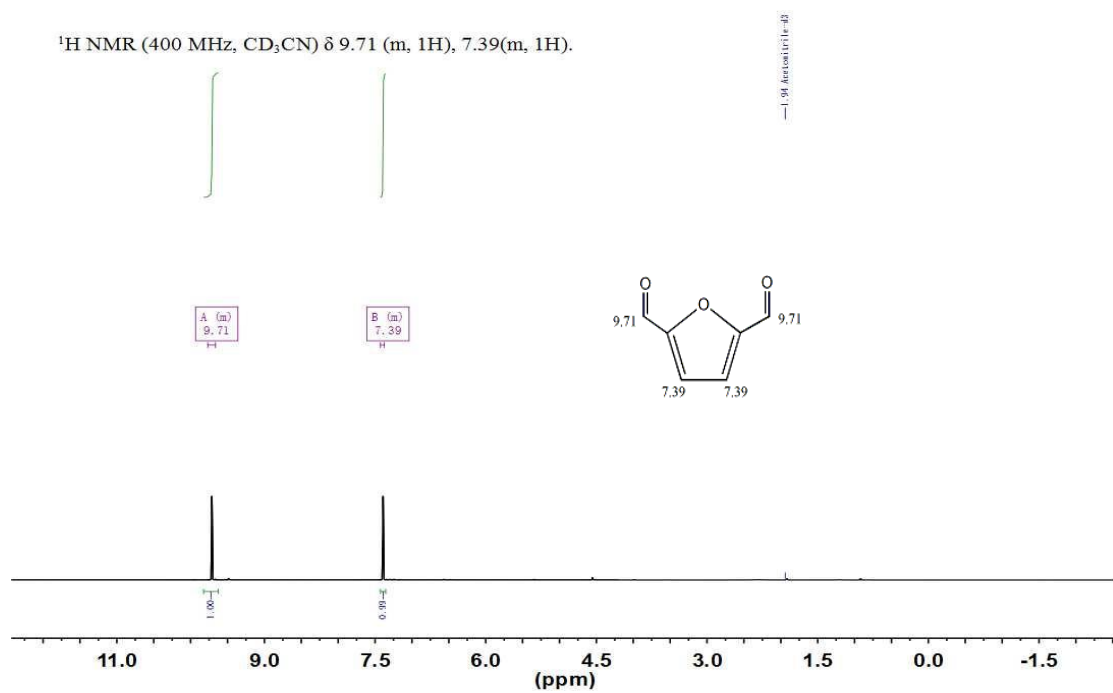

$^1\text{H}$ NMR(400 MHz,  $\text{CD}_3\text{CN}$ ) $\delta$  9.71(m, 1H), 7.39(m, 1H)

Figure s2 (d)  $^{13}\text{C}$  NMR of DFF

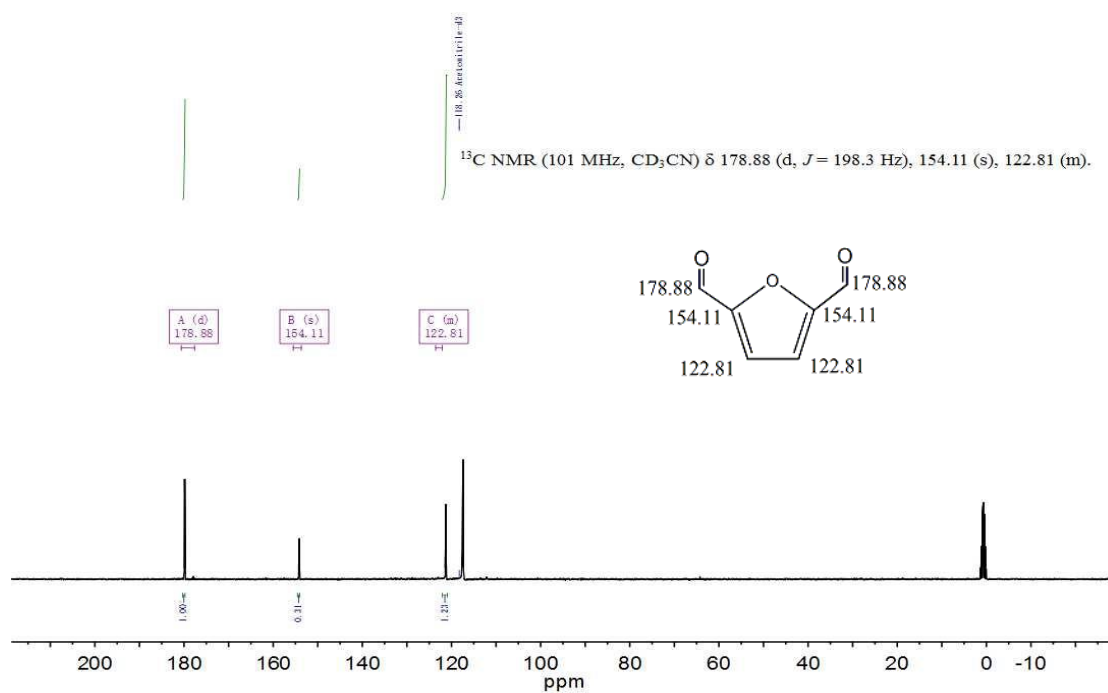

$^{13}\text{C}$ NMR(101 MHz,  $\text{CD}_3\text{CN}$ ) $\delta$  178.88(d,  $J=198.3$  Hz), 154.11(s), 122.81(m)

**Figure s2.** The NMR spectra of DFF and 5-HMF
